# Supplementary material for: GRB2 promotes thymocyte positive selection by facilitating THEMIS-mediated inactivation of SHP1
Source: PubMed Central journal article supplement — J Exp Med. 2023 Apr 17;220(7):e20221649. doi: 10.1084/jem.20221649 (PMC10114920; doi:10.1084/jem.20221649), 2023-04-17
Supplement: JEM_20221649_SourceDataF2.pdf [file JEM_20221649_SourceDataF2.pdf]

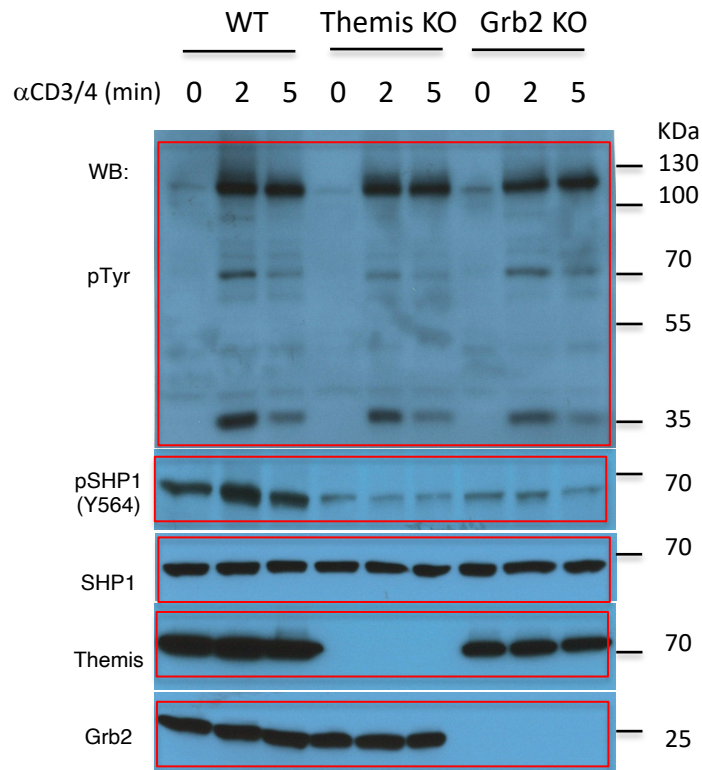

Source data Figure 2A

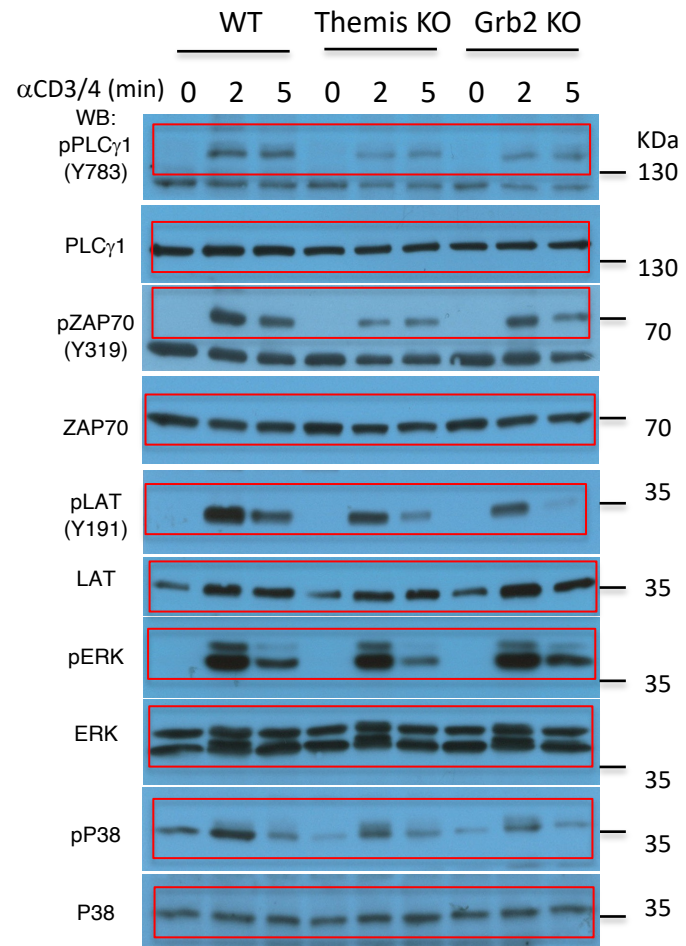

Source data Figure 2B

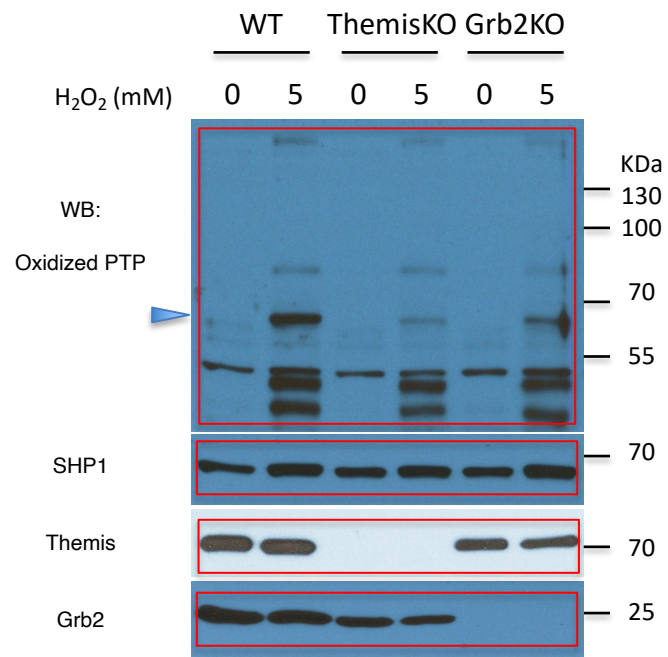

Source data Figure 2C

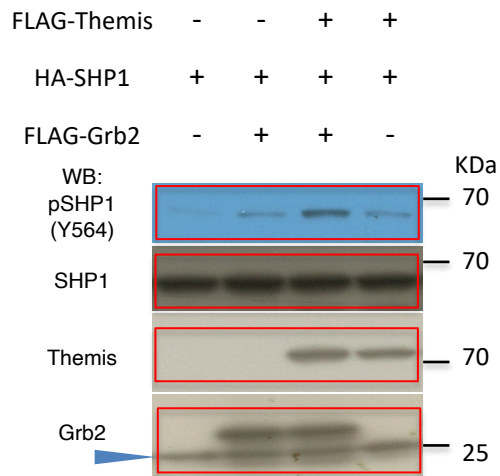

Source data Figure 2E

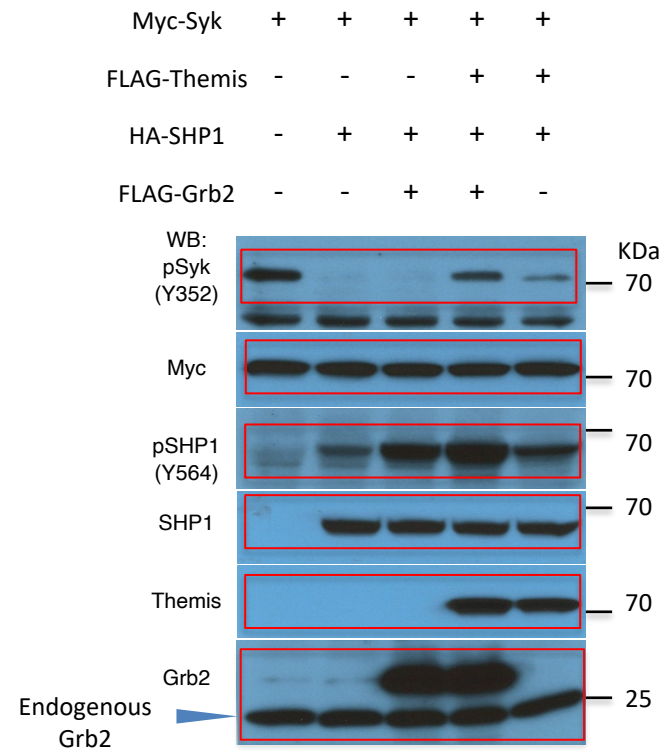

Source data Figure 2F
